20

21

## ABSTRACT

22

23

24

25

26

27

28

29

30

31

32

33

34

35

36

Atlantic sturgeon (*Acipenser oxyrinchus*), also known as Baltic sturgeon, is considered missing or extinct in German waters. Current conservation efforts focus on re-stocking activities, but classical hatchery rearing may reduce the fitness of the respective juveniles. In this study, we evaluated if foraging efficiency can be improved by short term training. Over a period of 14 d, we kept individuals of the training group in a raceway and fed them chironomids buried in a small sand spot to stimulate benthic feeding behavior while fish of the control group were fed in tanks without substrate. Thereafter, each fish was transferred to a raceway entirely covered with sand. For feeding, chironomids were randomly buried in the sand. During the first 7 days, trained fish recovered the feed significantly faster than untrained fish of the control group. Gene expression revealed an up-regulation in *neurod1* in all brain regions after 14 d of training. Thus, this study suggests that foraging efficiency can be improved through short-time training thus improve fitness upon restocking into the wild.

37

### Table of Abbreviations

38

d- days

39

TL- total length

40

41

42

43

**Key words:** *Acipenser oxyrinchus*, *fitness*, *foraging*, *conservation*, *neuroD1*, *pcna*, *bdnf*, *restocking*

44

45

46

## 47 **1. Introduction**

48 Sturgeons (Acipenseridae) were once native in all major rivers of the Northern  
49 Hemisphere, but over the last 100 years, they have shown a drastic decline due to fishing,  
50 habitat destruction and hydro-construction as well as pollution. In general, sturgeons exhibit  
51 an unusual combination of behavior and life history characteristics, particularly their late  
52 onset of maturity, making them highly vulnerable to anthropogenic impacts (Rochard et al.,  
53 1990). Nowadays, sturgeons are among the most endangered fish species worldwide (IUCN,  
54 2018) and several restoration programs have been implemented. Baltic sturgeon (*Acipenser*  
55 *oxyrinchus*) has been indigenous to the Baltic region for the last 8000 years, but is now  
56 considered extinct in German waters. Restocking programs have been established as a part of  
57 the ongoing recovery efforts to reintroduce Baltic sturgeons into their natural habitats and,  
58 thereby, initiate self-sustaining populations (Gessner et al. 2011).

59 However, there are major concerns regarding early life experiences in artificial  
60 environments that may not produce fish prepared to face life in the wild (Johnsson et al.,  
61 2014). Studies have shown that classical hatchery rearing negatively affects fish fitness and  
62 eventually the performance and survival of the fish upon release into the wild (Sulak et al.,  
63 2014). It is known that in the natural environment, sturgeons experience stimuli that shape  
64 and influence brain plasticity, cognition and behavioral phenotype. In contrast, modern  
65 hatchery practices, including high stocking densities, predictable feeding regimes and uniform  
66 stimulus-poor rearing conditions, can result in impaired cognition and behavioural responses  
67 in sturgeons reared in captivity, leading to reduced fitness and survival (Ebbesson and  
68 Braithwaite, 2012).

69 In contrast to mammals, fishes display remarkable plasticity in brain neurogenesis, which  
70 remains active throughout adult life. As a consequence, fish are sensitive too and respond to  
71 changes in both social and environmental conditions (Ebbesson and Braithwaite, 2012). In  
72 their natural habitats, most fishes experience environmental challenges and are able to adapt

73 their physiology and behavior in order to cope more effectively. Much of this flexibility is  
74 supported and influenced by cognition and neural plasticity. Furthermore, current literature on  
75 fish cognition indicates that many fish species are capable of learning and integrating multiple  
76 pieces of information that require more complex processes than associative learning  
77 (Ebbesson and Braithwaite, 2012).

78 Neuroscientists have paid special attention to the molecular mechanisms of neural  
79 plasticity associated with memory. This work has resulted in markers related to neural  
80 plasticity. Recent studies have indicated that proneural gene neurogenic differentiation 1  
81 factor (*neurod1*) is a reliable measure of neurogenesis in fish and a useful indicator of the  
82 neural plastic changes associated with memory and learning (Rossi et al., 2006; Grassie et al.,  
83 2013). Moreover, brain-derived neurotrophic factor (*bdnf*) has an important role in neural  
84 plasticity through sculpting and refinement of synapses and through promoting neurogenesis  
85 and cell survival (Castrén and Rantamäki, 2009). Though not specific to the brain,  
86 proliferating cell nuclear antigen (*pcna*) is a marker for cell proliferation in the respective  
87 organ (Leung et al., 2005). Taking into account the functions of the genes previously  
88 mentioned (*neurod1*, *bdnf* and *pcna*), they were of interest for this present study. In the wild,  
89 Baltic sturgeon is a benthic feeder which shows a digging behavior with help of the rostrum,  
90 preying on worms, shrimps and other invertebrates and making use of a powerful suction  
91 feeding mechanism (Carroll and Wainwright, 2003). Since most of their time is spent in  
92 waters with low visibility, feeding is performed by using a combination of olfactory, taste,  
93 tactile chemosensory cues and electroreceptors rather than vision (McClean et al., 2013; Miller,  
94 2004). The reduced importance of vision in feeding in sturgeons is supported by the  
95 observation that these fishes have relatively small eyes in relation to body size. In captivity,  
96 Baltic sturgeons are fed with artemia and thereafter with deep-frozen chironomids until they  
97 can be weaned on dry feed.

98        Taking into account that efficient foraging behavior is a key determinant of juvenile  
99        survival, the aim of this study was to determine whether natural foraging behaviour could be  
100       improved in hatchery-reared Baltic sturgeon following a short training period. In addition, this  
101       study also investigated whether this training resulted in positive changes in brain plasticity  
102       and cognition. To that end, following training, brains were sampled for gene expression  
103       analysis.

## 104 2. Materials and Methods

### 105 2.1. Experimental design

106 The experiments were performed at the experimental facilities at the Leibniz Institute of  
107 Freshwater Ecology and Inland Fisheries (IGB, Berlin, Germany) using fish from the sturgeon  
108 stock kept at the IGB. The experiment was conducted successively with 4 trained and 4 non-  
109 trained one year old Baltic sturgeon (*Acipenser oxyrinchus*) (TL 19-25 cm, 34 – 37 g)  
110 randomly distributed between 8 experimental raceway units (2.40 m \* 0.225 m \* 0.1 m) at a  
111 natural photoperiod and acclimatized for 7 days. Dissolved oxygen (8.41 – 9.16 mg/L), and  
112 temperature (18 – 20 °C) were measured daily, nitrit-nitrogen (0.002 mg/L) and total  
113 ammonia (TAN, 0.021 mg/L) every three days. Furthermore, 10 sturgeons were transferred to  
114 a constructed river stretch (6 m length, 1 m width, 0.2 m water depth, supplied by a Pontec  
115 Pandomax Eco 8000 pump) simulating close to natural conditions. The pond group was  
116 reared in an outside river stretch in order to compare the results of the trained and non-trained  
117 experimental groups to a more naturalistic environment (positive control).

118 Three experimental groups were established: non-trained, trained and pond (8 fish per  
119 group). The 8 raceways were assigned to non-trained and trained experimental group. The  
120 trained group had a sandy bottom (10 cm depth) while for the non-trained group the four  
121 raceways were left bare (10 cm depth). After a 7 day acclimatization period, during which the  
122 fish were fed chironomids, the training school started. The training was specifically designed  
123 to improve foraging behavior. Therefore, trained fish were fed chironomids hidden below a  
124 sand spot (< 10 cm), while the fish in the remaining bare raceways received chironomids on  
125 the bare tank bottom (non-trained). Before feeding in the respective raceway, fish were  
126 isolated by introducing a wall which was removed after feed had been introduced in the  
127 remaining part of the raceway. In the pond group, chironomids were hidden in the sandy  
128 substrate.

129 After 14 days, two sturgeon of each group were sampled for the gene expression, the  
130 remaining two fish were transferred to a raceway covered with sand (behavioral assessment). .  
131 For the assessment, chironomids were hidden in the sand and time until successful foraging  
132 was recorded for trained as well as for untrained fish (n=8). If chironomids were not  
133 successfully found within 120 min, food was removed. This assessment of foraging behaviour  
134 was repeated for seven consecutive days.

135 For the gene expression analysis, fish were euthanized with MS222 (300 ppm) followed  
136 by cutting through the spinal cord. Brains from 8 Baltic sturgeons per group (trained, non-  
137 trained, pond) were dissected and divided into three parts representing the three main brain  
138 regions (forebrain, midbrain and hindbrain). Samples were stored in RNA later at -80 °C for  
139 later gene expression analysis.

140 All experiments were in compliance with EU Directive 2010/63/EU and approved by the  
141 national authorities (G0305/15, Landesamt für Gesundheit und Soziales, Berlin, Germany).

## 142 **2.2. Gene expression**

143 Total RNA was extracted with TRIzol as described by (Reiser et al., 2011), including a  
144 DNase I digestion. Total RNA concentration and purity were determined in duplicates with a  
145 Nanodrop® ND-1000 UV–Vis spectrophotometer. Purity was validated as the ratio of the  
146 absorbance at 260 and 280 nm (A<sub>260</sub>/A<sub>280</sub>) ranging between 1.8 to 2.0. Moreover, integrity of  
147 the total RNA was checked by gel electrophoresis and, in 10% of all samples, on a RNA 6000  
148 Nano chips with an Agilent 2100 Bioanalyzer. To eliminate potential DNA contamination,  
149 DNase I digestion was performed in all samples prior to transcription. Next, mRNA was  
150 transcribed with MMLV Affinity reverse transcriptase (Agilent, 200 Units/μl) according to  
151 the manufacturer's instruction. In 10% of the samples, the enzyme was substituted by pure  
152 H<sub>2</sub>O, serving as a control (-RT) to monitor DNA contamination.

153 Species-specific primers targeting elongation factor 1 $\alpha$  (*efla*), brain-derived neurotrophic  
154 factor (*bdnf*), neurogenic differentiation factor (*neurod1*) and proliferating cell nuclear antigen  
155 (*pcna*) were designed using the sequence information available. Specificity of the assays was  
156 confirmed by direct sequencing (SeqLab, Germany). Real-time PCR was carried out with  
157 Mx3005p qPCR Cycler (Stratagene), monitoring specificity by melting curve analysis. Full  
158 specifications of qPCR assays, including primer sequences are given in Table 1.

159 Briefly, 2  $\mu$ L of the diluted sample (40 ng/ $\mu$ L) were used as template in 20  $\mu$ L PCR mix  
160 [SYBR-Green I (Invitrogen), 200  $\mu$ M of each dNTPs (Qbiogene), 3 mM MgCl<sub>2</sub> and 1 U  
161 Invitrogen Platinum Taq polymerase]. PCR conditions comprised an initial denaturation at 96  
162 °C for 3 min, followed by 40 cycles of denaturation at 96 °C for 30 s, primer annealing (for  
163 Ta, see Table 1) for 30 s and elongation at 72 °C for 30 s. PCR efficiencies were determined  
164 experimentally with a dilution series of a calibrator corresponding to 200 ng/ $\mu$ l. PCR assays  
165 for all individual samples were run in duplicate. Expression of target genes were calculated by  
166 the comparative CT method ( $\Delta\Delta$ CT) according to (Pfaffl, 2001), correcting for the assay  
167 efficiencies and normalizing to elongation factor 1 $\alpha$  (*efla*) as a housekeeping gene.  
168 Expression data are presented as fold increase of the respective control.

### 169 **2.3.Data analysis and statistical methods**

170 Data are presented as mean  $\pm$  standard deviation (SD). Prior to statistical analyses, all data  
171 were tested for normality of distribution using the Kolmogorov-Smirnov/ Shapiro Wilk test  
172 and for homogeneity using Levene test. Data on the behavior were analyzed using T-test. The  
173 level of significance used was  $P \leq 0.05$ . All statistical analyses were performed with GraphPrism  
174 statistical program.

175



## 176 **3. Results**

### 177 **3.1. Behavioral assessment**

178 In the behavioral assessment (Fig.1), significant differences were observed between non-  
179 trained and trained fish. While the time taken to initiate feeding successfully progressively  
180 decreased in both groups over the 7-day feeding study, this time was significantly less  
181 ( $p < 0.05$ ) in the trained compared to the non-trained fish at all time points (Fig. 1). On day 1,  
182 trained fish took  $58 \pm 6$  min to successful foraging whereas none of the non-trained fish  
183 recovered the chironomids within 120 min. After 7 d, chironomids were recovered after  $8 \pm 2$   
184 min and  $18 \pm 9$  min in trained and non-trained fish, respectively.

### 185 **3.2. Brain plasticity and cognition**

186 Selected genes related to brain plasticity and cognition (*neurod1*, *bdnf*, *pcna*) were  
187 analyzed in all three brain areas of Baltic sturgeon. Regarding the forebrain region (Fig. 2),  
188 significant differences were observed in the expression of *neurod1*. In particular, there was an  
189 up-regulation in the trained and pond groups with respect to the non-trained group in Baltic  
190 sturgeon after 14 d of training (Fig 2A). Furthermore, *pcna* expression showed an up-  
191 regulation in the pond group in comparison to both trained and non-trained groups in the  
192 forebrain of Baltic sturgeon (Fig. 2B). Similar results were observed in both midbrain and  
193 hindbrain region (Figs. 3B & 4B) of Baltic sturgeon in which *neurod1* showed an up-  
194 regulation in both the trained and pond groups compared to the non-trained group after 14 d  
195 of training.

196

197 **Discussion**

198           Stocking still remains an important conservation tool to combat the continuing global  
199 decline in fish biodiversity (Pikitch et al., 2005). Hatcheries are a key element in the recovery  
200 plan for sturgeon and have been regarded as a temporary measure until more aggressive  
201 habitat restoration programs are established. In fact, hatcheries are currently the only viable  
202 option to increase sturgeon populations. Hatchery programs for sturgeon have demonstrated  
203 considerable success in collecting or developing brood-stock, spawning, and rearing juveniles.  
204 However, the success of sturgeon hatcheries for conservation will ultimately depend on how  
205 effectively the hatchery-reared sturgeon can adapt to the natural habitat following release  
206 (Brown and Day, 2002).

207           In general, when released directly into the rivers, the survival of hatchery reared  
208 juveniles from different fish species is only approximately 1-3% after a few months due to a  
209 combination of predation, starvation and other factors (Brown and Day, 2002; Chebanov et  
210 al., 2011). Furthermore, it is widely accepted that post-release survival rates of hatchery-  
211 reared fish are lower compared to their wild conspecifics (Campton et al., 1991; Svasand and  
212 Kristiansen, 1990). Fisheries scientists are increasingly convinced that the uniform stimulus-  
213 poor environment experienced during hatchery rearing is one of the main contributing factors  
214 for this reduction in fitness and post-release survival (Ellis et al., 1997; Masuda and  
215 Tsukamoto, 1998). Thus, research to improve the post-release survival of hatchery-reared  
216 juveniles through behavioral performance is needed in order to continue successful recovery  
217 plans.

218           Suggested methods for improving the survival of hatchery fishes include  
219 supplementary feeding with live foods, the provision of under-water feeders, sub-aquatic  
220 structure, natural substratum, etc (Maynard and Flagg, 1994) In the wild, Baltic sturgeon is a  
221 benthic feeder which shows a digging behavior in order to find worms, shrimps and other

222 invertebrates from the substrate (Miller, 2004). Like all fish behavior, foraging relies on  
223 experience. The foraging skills of fishes become adjusted to ecological conditions through  
224 learning (Hughes et al., 1992; Warburton, 2003). Fish are able to learn to recognize prey, how  
225 to handle them and where they are likely to be located (Warburton, 2003). Results from the  
226 behavioral assessment of this study suggest that a short training period can improve the  
227 foraging ability of Baltic sturgeon by reducing the amount of time taken to successfully  
228 forage. This significant improvement was seen in the first 7 days, which can be critical when  
229 released into their natural habitat. This could be an important approach since when recaptured  
230 after release into the wild, hatchery fishes are often found to have empty stomachs (O'Grady,  
231 1983; Johnsen and Ugedal, 1989).

232         The understanding of fish cognition and the role played by different brain regions has  
233 improved significantly in recent years. Fish brain remains plastic throughout their entire life  
234 and continues to be sensitive to both social and environmental changes. Most fishes  
235 experience challenges in their environmental and are able to adjust and adapt their physiology  
236 and behavior to help them cope more effectively. Much of this flexibility is supported by  
237 cognition and neural plasticity. Neural plasticity allows for the development and function of  
238 cognitive processes (Ebbesson and Braithwaite, 2012; Knudsen, 2004), and thus has a large  
239 role in the adaptation to changing environments. Current literature on fish cognition indicates  
240 that many fish species are capable of learning and integrating multiple pieces of information  
241 that require more complex processes than just associative learning (Ebbesson and Braithwaite,  
242 2012). The most important brain area for these complex neural processes in fish is the  
243 dorsolateral telencephalon (DI) (Durán et al., 2010; Rodríguez et al., 2002; Wullimann and  
244 Mueller, 2004), and has been recognized as the functional homologue of the mammalian  
245 hippocampus (Mueller et al., 2011; Mueller and Wullimann, 2009).

246 Studies using intermediate early genes (IEG) make possible to investigate which brain  
247 regions are activated during a particular cognitive process. In this study, three main genes  
248 were studied: neurogenic differentiation factor (*neurod1*), brain-derived neurotrophic factor  
249 (*bdnf*) and proliferating cell nuclear antigen (*pcna*). Neurogenic differentiation factor  
250 (*neurod1*), is a member of a family of pro-neural genes, which is involved in the initiation and  
251 regulation of neural differentiation (Kiefer, 2005). Recent studies have shown that expression  
252 levels of *neurod1* mRNA is a reliable measure of neurogenesis in fish and a useful indicator  
253 of the neural plastic changes associated with memory and learning (Grassie et al., 2013;  
254 Salvanes et al., 2013). Brain-derived neurotrophic factor (*bdnf*) is the most abundantly  
255 expressed member of the nerve growth factor family, neurotrophins, and has an important role  
256 in neural plasticity through sculpting and refinement of synapses and through promoting  
257 neurogenesis and cell survival (Castrén and Rantamäki, 2009). It has recently been shown that  
258 environmental challenges alter *bdnf* expression in the telencephalon of Atlantic salmon  
259 (Vindas et al., 2017). Regarding proliferating cell nuclear antigen (*pcna*), it can be used as a  
260 marker for cell proliferation (Leung et al., 2005).

261 In this study, *neurod1* was up-regulated in all brain regions in both the trained-group  
262 and fish raised in the semi-natural pond, in comparison to the non-trained fish. This might be  
263 an indication of the stimulation of cognitive processes such as learning and memory as a  
264 result of the training method. Thus, it indicates that the fish from the trained group generally  
265 learnt to locate the prey. These results are in agreement with the results found in the  
266 behavioral assessment.

267 Currently, the main limitation of stocking programs for most fish species is the high  
268 level of post-release mortality. The most critical period seems to be the immediate days  
269 following release as hatchery-reared fish generally display reduce life fitness traits such as  
270 foraging and anti-predator behaviour.. In our study, it was demonstrated that a short time

271 period of training could potentially help Baltic sturgeon in their process of learning to  
272 successfully forage, which could be a first approach to improve restocking practices. Since  
273 rearing conditions are highly important in stocking for conservation, hatcheries should aim to  
274 produce juveniles that are morphologically, genetically, behaviorally and physiologically  
275 similar to the stock they pretend to enhance and recover. Furthermore, restoration programs  
276 require a variety of information on sturgeon and thus, it is interesting to produce and keep up  
277 to date extensive reviews of the literature. Further work is needed in order to determine the  
278 survival of sturgeon reared under alternative hatchery-rearing practices taking into account  
279 other key factors in sturgeon survival.

## 280 **Conclusion**

281 To our knowledge, this is the first study that looks into foraging training in Baltic sturgeon to  
282 improve fitness for re-stocking purposes. We observed that both behavioural and  
283 physiological parameters were improved by a short-term training period. This improvement  
284 could significantly help Baltic sturgeon survive in the wild, since the highest percentage of  
285 mortality happens during the first days post-release.

286

287

288 **Declaration of Interest**

289           There are no conflicts to declare

290 **Acknowledgments**

291           The authors thank Eva Kreuz for her contribution in the laboratory. The study was  
292 supported by the European Training Network of the Marie Skłodowska-Curie Actions ITN  
293 “Improved production strategies of endangered freshwater species”. This project has received  
294 funding from the European Union’s Horizon 2020 research and innovation program under the  
295 Marie Skłodowska-Curie grant No [642893]

296 **Author contributions**

297           The experiment was conducted by C.E.S. The laboratory analysis was carried out by M.C.R.  
298 M.C.R. wrote the first draft of the manuscript. S.V. supervised the project. The manuscript  
299 was revised by all co-authors.

300

301 **References**

- 302 Brown, C., Day, R.L., 2002. The future of stock enhancements: Lessons for hatchery practice  
303 from conservation biology. *Fish Fish.* 3, 79–94. [https://doi.org/10.1046/j.1467-](https://doi.org/10.1046/j.1467-2979.2002.00077)  
304 2979.2002.00077.
- 305 Campton, D.E., Allendorf, F.W., Behnke, R.J., Utter, F.M., Chilcote, M.W., Leider, S.A.,  
306 1991. Reproductive Success of Hatchery and Wild Steelhead. *Trans. Am. Fish. Soc.* 120,  
307 816-827. [https://doi.org/10.1577/1548-8659\(1991\)120](https://doi.org/10.1577/1548-8659(1991)120).
- 308 Carroll, A.M., Wainwright, P.C., 2003. Functional Morphology of Prey Capture in the  
309 Sturgeon, *Scaphirhynchus albus*. *J. Morphol.* 284, 270–  
310 284. <https://doi.org/10.1002/jmor.10095>.
- 311 Castrén, E., Rantamäki, T., 2009. The Role of BDNF and Its Receptors in Depression and  
312 Antidepressant Drug Action: Reactivation of Developmental Plasticity. *Dev.*  
313 *Neurobiol.* 70, 289–297. <https://doi.org/10.1002/dneu.20758>.
- 314 Chebanov, M., Rosenthal, H., Gessner, J., Van Anrooy, R., Doukakis, P., Pourkazemi, M.,  
315 Williot, P., 2011. Sturgeon hatchery practices and management for release: Guidelines.  
316 *FAO Fish. Aquac.* 110.
- 317 Durán, E., Ocaña, F.M., Broglio, C., Rodríguez, F., Salas, C., 2010. Lateral but not medial  
318 telencephalic pallium ablation impairs the use of goldfish spatial allocentric strategies in  
319 a “hole-board” task. *Behav. Brain Res.* 214, 480–  
320 487. <https://doi.org/10.1016/j.bbr.2010.06.010>.
- 321 Ebbesson, L.O.E., Braithwaite, V.A., 2012. Environmental effects on fish neural plasticity  
322 and cognition. *J. Fish Biol.* 81, 2151–2174. [https://doi.org/10.1111/j.1095-](https://doi.org/10.1111/j.1095-8649.2012.03486)  
323 8649.2012.03486.
- 324 Ellis, T., Howell, B.R., Hayes, J., 1997. Morphological differences between wild and  
325 hatchery-reared turbot. *J. Fish Biol.* 50, 1124–1128.
- 326 Gessner, J., Arndt, G.M., Fredrich, F., Ludwig, A., Kirschbaum, F., Bartel, R., von Nordheim,  
327 H., 2011. Remediation of Atlantic Sturgeon *Acipenser oxyrinchus* in the Oder River:  
328 Background and First Results. pp 539-559. In Willio, P. et al (eds), *Biology and*  
329 *Conservation of the European Sturgeon Acipenser sturio* L. 1758, DOI 10.1007/978-3-  
330 642-20611-5\_41, Springer-Verlag Berlin Heidelberg 2011.

- 331 Grassie, C., Braithwaite, V.A., Nilsson, J., Nilsen, T.O., Teien, H.C., Handeland, S.O.,  
332 Stefansson, S.O., Tronci, V., Gorissen, M., Flik, G., Ebbesson, L.O.E., 2013. Aluminum  
333 exposure impacts brain plasticity and behavior in Atlantic salmon (*Salmo salar*). J. Exp.  
334 Biol. 216, 3148–3155. <https://doi.org/10.1242/jeb.083550>.
- 335 Hughes, R.N., Kaiser, M.J., Mackney, P.A., Warburton, K., 1992. Optimizing foraging  
336 behaviour through learning. J. Fish Biol. 41, 77–91. <https://doi.org/10.1111/j.1095-8649.1992.tb03870>.
- 338 IUCN, 2018. The IUCN Red List of Threatened Species. Version 2018-1.
- 339 Johnsen, B.O., Ugedal, O., 1989. Feeding by hatchery-reared brown trout , *Salmo trutta* L .  
340 released in lakes. Aquac. Fish. Manag. 20, 97–104.
- 341 Johnsson, J.I., Brockmark, S., Näslund, J., 2014. Environmental effects on behavioural  
342 development consequences for fitness of captive-reared fishes in the wild. J. Fish Biol.  
343 85, 1946–1971. <https://doi.org/10.1111/jfb.12547>.
- 344 Kiefer, J.C., 2005. Proneural factors and neurogenesis. Dev. Dyn. 234, 808–813.  
345 <https://doi.org/10.1002/dvdy.20522>.
- 346 Knudsen, E.I., 2004. Sensitive periods in the development of the brain and behavior. J Cogn  
347 Neurosci 16, 1412–1425. <https://doi.org/10.1162/0898929042304796>.
- 348 Leung, A.Y.H., Leung, J.C.K., Chan, L.Y.Y., Ma, E.S.K., Kwan, T.T.F., Lai, K.N., Meng, A.,  
349 Liang, R., 2005. Proliferating cell nuclear antigen (PCNA) as a proliferative marker  
350 during embryonic and adult zebrafish hematopoiesis. Histochem. Cell Biol. 124, 105–  
351 111. <https://doi.org/10.1007/s00418-005-0003-2>.
- 352 Masuda, R., Tsukamoto, K., 1998. Stock enhancement in Japan: Review and Perspective. Bull.  
353 Mar. Sci. 62, 337–358.
- 354 Maynard, D.J., Flagg, T. A., 1994. A review of seminatural culture strategies for enhancing  
355 the postrelease survival of anadromous salmonids. Am. Fish. Soc. 1–34.
- 356 Mclean, M.F., Dadswell, M.J., Stokesbury, M.J.W., 2013. Feeding ecology of Atlantic  
357 sturgeon, *Acipenser oxyrinchus oxyrinchus* Mitchill , 1815 on the infauna of intertidal  
358 mudflats of Minas Basin, Bay of Fundy. J. Appl. Ichthyol. 29, 503–509.  
359 <https://doi.org/10.1111/jai.12175>.



- 360 Miller, M.J., 2004. the Ecology and Functional Morphology of Feeding of North American  
361 Sturgeon and Paddlefish. *Ocean Res.* 87–102. [https://doi.org/10.1007/1-4020-2833-4\\_5](https://doi.org/10.1007/1-4020-2833-4_5).
- 362 Mueller, T., Dong, Z., Berberoglu, M., Guo, S., 2011. The dorsal pallium in zebrafish, *Danio*  
363 *rerio* (Cyprinidae, Teleostei). *Brain Res.* 95–105.  
364 <https://doi.org/10.1016/j.brainres.2010.12.089>.
- 365 Mueller, T., Wullimann, M.F., 2009. An evolutionary interpretation of teleostean forebrain  
366 anatomy. *Brain. Behav. Evol.* 74, 30–42. <https://doi.org/10.1159/000229011>.
- 367 O'Grady, M.F., 1983. Observations on the dietary habits of wild and stocked brown trout,  
368 *Salmo trutta* L., in Irish lakes. *J. Fish Biol.* 22, 593–601.
- 369
- 370 Pfaffl, M.W., 2001. A new mathematical model for relative quantification in real-time RT-  
371 PCR. *Nucleic Acids Res.* 29, 45.
- 372 Pikitch, E.K., Doukakis, P., Lauck, L., Chakrabarty, P., Erickson, D.L., 2005. Status, trends  
373 and management of sturgeon and paddle sh series. *Wildl. Conserv.* 233–265.  
374 <https://doi.org/10.1111/j.1467-2979.2005.00190>.
- 375 Reiser, S., Wuertz, S., Schroeder, J.P., Kloas, W., Hanel, R., 2011. Risks of seawater  
376 ozonation in recirculation aquaculture - Effects of oxidative stress on animal welfare of  
377 juvenile turbot (*Psetta maxima*, L.). *Aquat. Toxicol.* 105, 508–517.  
378 <https://doi.org/10.1016/j.aquatox.2011.08.004>.
- 379 Rochard, E., Castelnaud, G., Lepage, M., 1990. Sturgeons (Pisces: Acipenseridae); threats and  
380 prospects. *J. Fish Biol.* 37, 123–132. <https://doi.org/10.1111/j.1095-8649.1990.tb05028>.
- 381 Rodríguez, F., López, J.C., Vargas, J.P., Gómez, Y., Broglio, C., Salas, C., 2002.  
382 Conservation of spatial memory function in the pallial forebrain of reptiles and ray-  
383 finned fishes. *J. Neurosci.* 22, 2894–903. <https://doi.org/20026211>.
- 384 Rossi, C., Angelucci, A., Constantin, L., Braschi, C., Mazzantini, M., Babbini, F., Fabbri,  
385 M.E., Tessarollo, L., Maffei, L., Berardi, N., Caleo, M., 2006. Brain-derived  
386 neurotrophic factor (BDNF) is required for the enhancement of hippocampal  
387 neurogenesis following environmental enrichments. *Eur. J. Neurosci.* 24, 1850–1856.
- 388 Salvanes, A.G.V., Moberg, O., Ebbesson, L.O.E., Nilsen, T.O., Jensen, K.H., Braithwaite,

389 V.A., 2013. Environmental enrichment promotes neural plasticity and cognitive ability in  
390 fish Environmental enrichment promotes neural plasticity and cognitive ability in fish.  
391 Proc. R. Soc. B 280. <https://doi.org/10.1098/rspb.2013.1331>.

392 Sulak, B.K.J., Randall, M.T., Clugston, J.P., 2014. Survival of hatchery Gulf sturgeon (  
393 *Acipenser oxyrinchus desotoi* Mitchill , 1815 ) in the Suwannee River , Florida□: A 19-  
394 year evaluation 30, 1428–1440. <https://doi.org/10.1111/jai.12607>.

395 Svasand, T., Kristiansen, T.S., 1990. Enhancement studies of coastal cod in western Norway .  
396 Part IV . Mortality of reared cod after release 30–39.

397 Vindas, M.A., Gorissen, M., Höglund, E., Flik, G., Tronci, V., Damsgård, B., Thörnqvist, P.-  
398 O., Nilsen, T.O., Winberg, S., Øverli, Ø., Ebbesson, L.O.E., 2017. How do individuals  
399 cope with stress? Behavioural, physiological and neuronal differences between proactive  
400 and reactive coping styles in fish. J. Exp. Biol. 220, 1524–1532.  
401 <https://doi.org/10.1242/jeb.153213>.

402 Warburton, K., 2003. Learning of foraging skills by fish. Fish Fish. 4, 203–215.

403 Wullimann, M.F., Mueller, T., 2004. Teleostean and Mammalian Forebrains Contrasted□:  
404 Evidence from Genes to 162, 143–162. <https://doi.org/10.1002/cne.20183>.

405

406

407

## 408 **Figure legends**

409 **Figure 1.** Behavioural assessment. Time taken by Baltic sturgeon (*A. oxyrinchus*) of the non-  
410 trained, trained and pond group to successfully forage. Significant differences are indicated by  
411 asterisk (Tukey's,  $P < 0.05$ ,  $n = 8$ )

412 **Figure 2.** Gene expression, determined by qPCR, in the forebrain of Baltic sturgeon (*A.*  
413 *oxyrinchus*) of the non-trained, trained and pond group after 14 days of training. Data are  
414 expressed as fold relative. Groups with different subscripts are significantly different ( $P <$   
415  $0.05$ ,  $n = 8$ ). Statistic test used (Dunn's or Tukey's) is indicated below the respective graph.

416 **Figure 3.** Gene expression, determined by qPCR, in the midbrain of Baltic sturgeon (*A.*  
417 *oxyrinchus*) of the non-trained, trained and pond group after 14 days of training. Data are  
418 expressed as fold relative. Groups with different subscripts are significantly different ( $P <$   
419  $0.05$ ,  $n = 8$ ). Statistic test used (Dunn's or Tukey's) is indicated below the respective graph.

420 **Figure 4.** Gene expression, determined by qPCR, in the hindbrain of Baltic sturgeon (*A.*  
421 *oxyrinchus*) of the non-trained, trained and pond group after 14 days of training. Data are  
422 expressed as fold relative. Groups with different subscripts are significantly different ( $P <$   
423  $0.05$ ,  $n = 8$ ). Statistic test used (Dunn's or Tukey's) is indicated below the respective graph.

## 424 **Tables**

425 **Table 1.** Specifications of qPCR assays including primer sequences, annealing temperature  
426 ( $T_a$ ), amplicon length [bp], PCR efficiency (Eff) and NCBI accession number of the  
427 respective housekeeping (ef) and target genes: ef- elongation factor 1 a, neurod1- neurogenic  
428 differentiation factor, bdnf - brain-derived neurotrophic factor, pcna- proliferating cell nuclear  
429 antigen-

430

431

| gene          | primer | 5'-3' sequence       | $T_a$ [°C] | length [bp] | Eff. <sup>1</sup> [%] | GeneBank # |
|---------------|--------|----------------------|------------|-------------|-----------------------|------------|
| <i>efa</i>    | f      | TCAgggAgAAgATTgACCGT | 65         | 239         | 97                    | 2160436    |
|               | r      | AgACTTggTgACTTTgCCTg |            |             |                       |            |
| <i>neuroD</i> | f      | TATCATCCCCCTggTCTgCC | 65         | 175         | 98                    | 2160451    |
|               | r      | CATTAACgCTCAgTggTggg |            |             |                       |            |
| <i>pcna</i>   | f      | gAAgAAggTTTTggAggCg  | 65         | 187         | 92.5                  | 2160452    |

|             |   |                      |    |     |      |         |
|-------------|---|----------------------|----|-----|------|---------|
|             | r | CCTgCTCAgATTgACCCC   |    |     |      |         |
| <i>bdnf</i> | f | gACggCCgTAgACAAgAAgA | 65 | 188 | 84.5 | 2160439 |
|             | r | TggTCCgACACTgTgAATTg |    |     |      |         |

---

<sup>1</sup>Efficiency was determined from serial dilution series

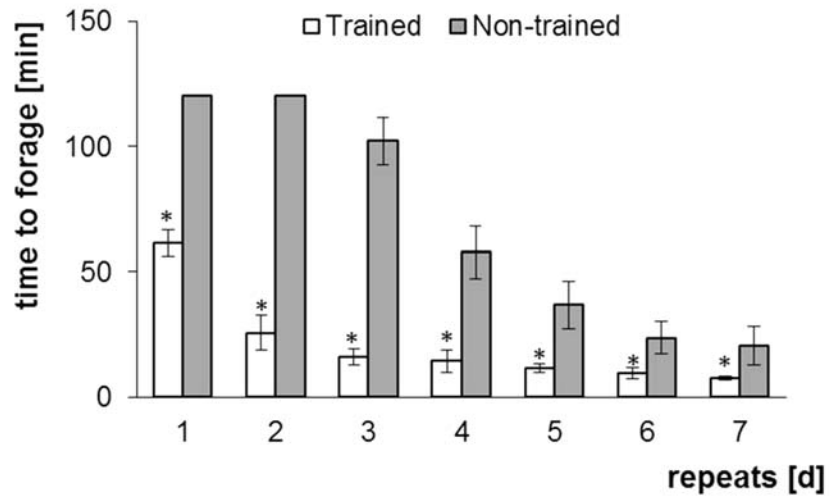

**Figure 1.** Behavioural assessment. Time taken by Baltic sturgeon (*A. oxyrinchus*) of the non-trained, trained and pond group to successfully forage. Significant differences are indicated by asterisk (Tukey's,  $P < 0.05$ ,  $n = 8$ )

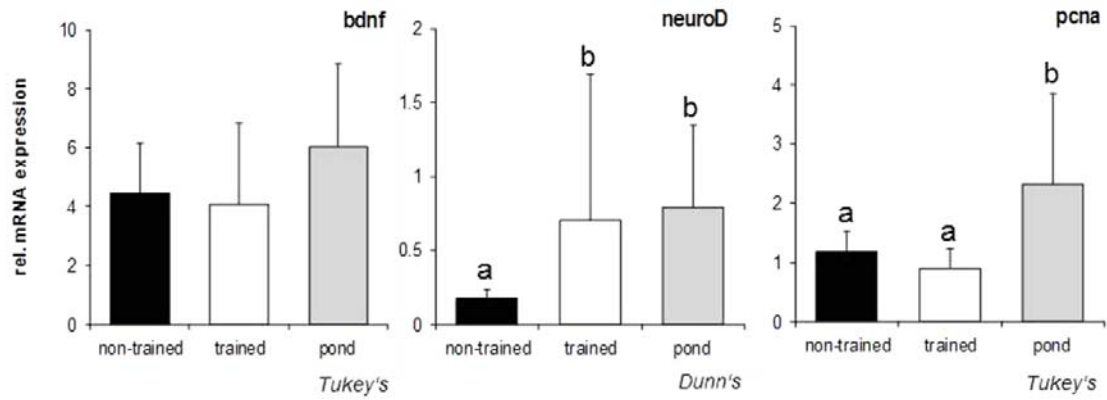

**Figure 2.** Gene expression, determined by qPCR, in the forebrain of Baltic sturgeon (*A. oxyrinchus*) of the non-trained, trained and pond group after 14 days of training. Data are expressed as fold relative. Groups with different subscripts are significantly different ( $P < 0.05$ ,  $n = 8$ ). Statistic test used (Dunn's or Tukey's) is indicated below the respective graph.

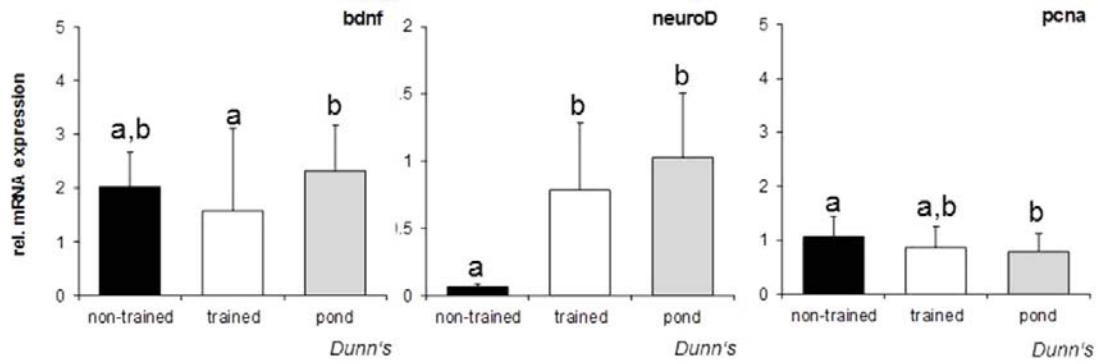

**Figure 3.** Gene expression, determined by qPCR, in the midbrain of Baltic sturgeon (*A. oxyrinchus*) of the non-trained, trained and pond group after 14 days of training. Data are expressed as fold relative. Groups with different subscripts are significantly different ( $P < 0.05$ ,  $n = 8$ ). Statistic test used (Dunn's or Tukey's) is indicated below the respective graph.

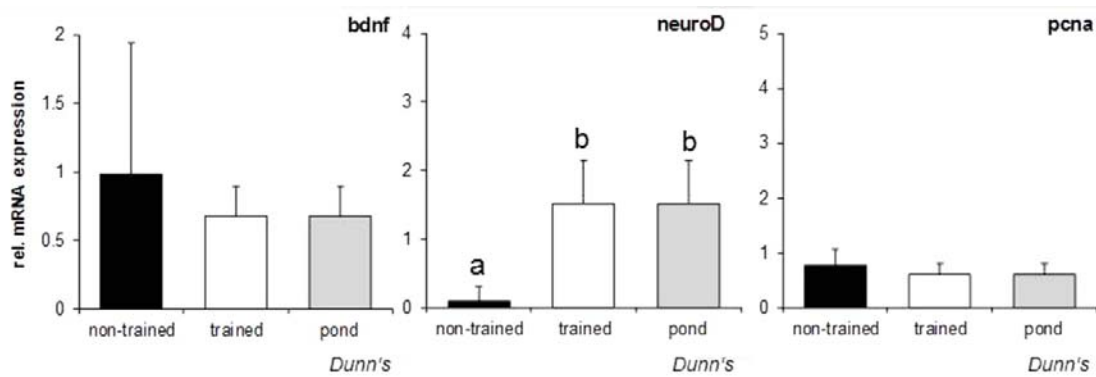

**Figure 4.** Gene expression, determined by qPCR, in the hindbrain of Baltic sturgeon (*A. oxyrinchus*) of the non-trained, trained and pond group after 14 days of training. Data are expressed as fold relative. Groups with different subscripts are significantly different ( $P < 0.05$ ,  $n = 8$ ). Statistic test used (Dunn's or Tukey's) is indicated below the respective graph.
